# Supplementary material for: Detailing sexual outcomes after treatment of localised prostate cancer with focal therapy using various energy sources: protocol for a mixed-methods study
Source: HighWire-hosted journal article supplement (doi:10.1136/bmjopen-2020-045500), 2020-12-01
Supplement: bmjopen-2020-045500supp001_data_supplement.pdf [file bmjopen-2020-045500supp001_data_supplement.pdf]

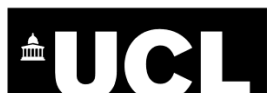

**Interview schedule – SAFE study - retrospective**

**Question 1: Tell me about your sexual function prior to the surgery...were you complaining of anything?**

**Question 2: Tell me about your expectations before the surgery, as you recall them? What were you expecting? What did you think would be happening?**

**Question 3: Tell me about the post-operative period, as you recall it? What do you remember experiencing?**

- Erections
- Ejaculation
- Orgasm/climacturia
- Pain or discomfort
- Loss of sensitivity
- Penile curvature
- Virility/masculinity
- Libido/sexual desire
- Urinary symptoms and importance

**Question 4: Tell me about your current status...what is different now that you wish you had been told about or currently bothers you?**

- Global satisfaction
- Treatments sought and efficiency
- Other symptoms

Sexual Assessment after Focal Energy treatment/SAFE study, Interview guide retrospective, IRAS: 278558, Version 1.0 date (29/06/20), REC Reference (20/NW/0335)

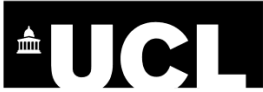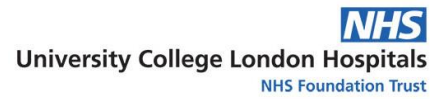

**Question 5: Tell me about your global experience...what do you wish had been done differently during your management, regarding your sexual function?**

- Information
- Partner-related issues
- Shame/cancer-related stress
- Masculinity/virility
- Other

Sexual Assessment after Focal Energy treatment/SAFE study, Interview guide retrospective, IRAS: 278558, Version 1.0 date (29/06/20), REC Reference (20/NW/0335)



**Interview schedule – SAFE study – prospective BEFORE treatment**

**Question 1: Tell me about your current sexual function... are you complaining of anything?**

**Question 2: Tell me about your expectations before the surgery? What are you expecting?  
What do you think will happen?**

**Question 4: Tell me about the information you have been given... what have you noted  
from it and what is the most important for you in the future?**

**Question 5: Tell me about your priorities when choosing the treatment?**

- Sexual function
- Urinary function
- Oncological safety
- Reputation of the physician/team
- Other

Sexual Assessment after Focal Energy treatment/SAFE study, Interview guide retrospective, IRAS: 278558, Version 1.0 date (29/06/20), REC Reference (20/NW/0335)

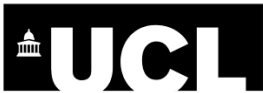

**Interview schedule – SAFE study – prospective AFTER treatment**

**Question 1: Tell me about your expectations before the surgery, do you think things have happened as planned or expected?**

**Question 3: Tell me about the post-operative period? What do you remember experiencing?**

- Erections
- Ejaculation
- Orgasm/climacturia
- Pain or discomfort
- Loss of sensitivity
- Penile curvature
- Virility/masculinity
- Libido/sexual desire
- Urinary symptoms and importance

**Question 4: Tell me about your current status...what is different now that you wish you had been told about or currently bothers you?**

- Global satisfaction
- Treatments sought and efficiency
- Other symptoms

**Question 5: Tell me about your global experience...what do you wish had been done differently during your management, regarding your sexual function?**

- Information
- Partner-related issues
- Shame/cancer-related stress
- Masculinity/virility
- Other

Sexual Assessment after Focal Energy treatment/SAFE study, Interview guide retrospective, IRAS: 278558, Version 1.0 date (29/06/20), REC Reference (20/NW/0335)
